# Supplementary material for: Profiles of Risky Driving Behaviors in Adolescent Drivers: A Cluster Analysis of a Representative Sample from Tuscany Region (Italy)
Source: MDPI journal article supplement (doi:10.3390/ijerph18126362), 2021-06-11
Supplement: s1 [file s1]

**Table S1.** Characteristics of the study population and of the four clusters solution

| Characteristics                   |                                   | Total    |      | Safe Drivers |      | Average Drivers |      | Careless Drivers |      | Reckless & Impaired Drivers |      |
|-----------------------------------|-----------------------------------|----------|------|--------------|------|-----------------|------|------------------|------|-----------------------------|------|
|                                   |                                   | <i>N</i> | %    | <i>N</i>     | %    | <i>N</i>        | %    | <i>N</i>         | %    | <i>N</i>                    | %    |
| Sex                               | <i>Male</i>                       | 1,473    | 68.1 | 685          | 69.5 | 326             | 69.2 | 293              | 63.1 | 169                         | 69.8 |
|                                   | <i>Female</i>                     | 689      | 31.9 | 300          | 30.5 | 145             | 30.8 | 171              | 36.9 | 73                          | 30.2 |
| Age                               | <i>14</i>                         | 185      | 8.6  | 145          | 14.7 | 23              | 4.9  | 16               | 3.4  | 1                           | 0.4  |
|                                   | <i>15</i>                         | 291      | 13.5 | 206          | 20.9 | 35              | 7.4  | 30               | 6.5  | 20                          | 8.3  |
|                                   | <i>16</i>                         | 389      | 18.0 | 236          | 24.0 | 76              | 16.1 | 56               | 12.1 | 21                          | 8.7  |
|                                   | <i>17</i>                         | 383      | 17.7 | 216          | 21.9 | 75              | 15.9 | 63               | 13.6 | 29                          | 12.0 |
|                                   | <i>18</i>                         | 914      | 42.3 | 182          | 18.5 | 262             | 55.6 | 299              | 64.4 | 171                         | 70.7 |
| Educational level of the mother   | <i>Pre-school education</i>       | 27       | 1.3  | 15           | 1.7  | 4               | 0.9  | 6                | 1.4  | 2                           | 0.9  |
|                                   | <i>Primary education</i>          | 29       | 1.4  | 8            | 0.9  | 5               | 1.1  | 9                | 2.0  | 7                           | 3.0  |
|                                   | <i>Lower secondary education</i>  | 472      | 23.1 | 186          | 20.5 | 111             | 24.4 | 115              | 26.0 | 60                          | 25.5 |
|                                   | <i>Upper secondary education</i>  | 1,012    | 49.6 | 475          | 52.3 | 227             | 50.0 | 197              | 44.5 | 113                         | 48.1 |
|                                   | <i>Bachelor's degree</i>          | 99       | 4.9  | 40           | 4.4  | 18              | 4.0  | 28               | 6.3  | 13                          | 5.5  |
|                                   | <i>Master's degree or higher</i>  | 401      | 19.7 | 184          | 20.3 | 89              | 19.6 | 88               | 19.9 | 40                          | 17.0 |
| Educational level of the father   | <i>Pre-school education</i>       | 39       | 1.9  | 22           | 2.4  | 5               | 1.1  | 5                | 1.1  | 7                           | 3.1  |
|                                   | <i>Primary education</i>          | 48       | 2.4  | 11           | 1.2  | 12              | 2.7  | 13               | 3.0  | 12                          | 5.2  |
|                                   | <i>Lower secondary education</i>  | 728      | 36.1 | 299          | 33.1 | 176             | 38.9 | 154              | 35.4 | 99                          | 43.2 |
|                                   | <i>Upper secondary education</i>  | 869      | 43.1 | 401          | 44.5 | 194             | 42.9 | 192              | 44.1 | 82                          | 35.8 |
|                                   | <i>Bachelor's degree</i>          | 62       | 3.1  | 33           | 3.7  | 9               | 2.0  | 12               | 2.8  | 8                           | 3.5  |
|                                   | <i>Master's degree or higher</i>  | 272      | 13.5 | 136          | 15.1 | 56              | 12.4 | 59               | 13.6 | 21                          | 9.2  |
| Occupational status of the mother | <i>Unemployed</i>                 | 474      | 23.1 | 234          | 25.2 | 92              | 20.1 | 99               | 22.4 | 49                          | 21.8 |
|                                   | <i>Salaried/pensioner</i>         | 1,579    | 76.9 | 696          | 74.8 | 365             | 79.9 | 342              | 77.6 | 176                         | 78.2 |
| Occupational status of the father | <i>Unemployed</i>                 | 68       | 3.4  | 31           | 3.4  | 11              | 2.5  | 15               | 3.5  | 11                          | 5.2  |
|                                   | <i>Salaried/pensioner</i>         | 1,916    | 96.6 | 872          | 96.6 | 436             | 97.5 | 409              | 96.5 | 199                         | 94.8 |
| Parental family status            | <i>Married/living together</i>    | 1,757    | 82.3 | 827          | 84.7 | 378             | 81.5 | 368              | 80.3 | 184                         | 78.0 |
|                                   | <i>Divorced/separated/widowed</i> | 377      | 17.7 | 149          | 15.3 | 86              | 18.5 | 90               | 19.7 | 52                          | 22.0 |
| Family relationship               | <i>Very poor</i>                  | 32       | 1.5  | 10           | 1.0  | 8               | 1.7  | 5                | 1.1  | 9                           | 3.8  |
|                                   | <i>Poor</i>                       | 44       | 2.0  | 18           | 1.8  | 6               | 1.3  | 14               | 3.1  | 6                           | 2.5  |
|                                   | <i>Fair</i>                       | 177      | 8.2  | 70           | 7.1  | 46              | 9.8  | 33               | 7.2  | 28                          | 11.7 |
|                                   | <i>Good</i>                       | 800      | 37.3 | 367          | 37.4 | 166             | 35.5 | 181              | 39.4 | 86                          | 36.0 |
|                                   | <i>Very good</i>                  | 1,094    | 51.0 | 516          | 52.6 | 242             | 51.7 | 226              | 49.2 | 110                         | 46.0 |
| Peer relationship                 | <i>Very poor</i>                  | 14       | 0.7  | 8            | 0.8  | 3               | 0.6  | 1                | 0.2  | 2                           | 0.8  |

|                                |                   |       |      |     |      |     |      |     |      |     |      |
|--------------------------------|-------------------|-------|------|-----|------|-----|------|-----|------|-----|------|
|                                | <i>Poor</i>       | 17    | 0.8  | 9   | 0.9  | 4   | 0.9  | 2   | 0.4  | 2   | 0.8  |
|                                | <i>Fair</i>       | 154   | 7.2  | 72  | 7.3  | 28  | 6.0  | 30  | 6.5  | 24  | 10.0 |
|                                | <i>Good</i>       | 992   | 46.1 | 453 | 46.2 | 231 | 49.4 | 211 | 45.7 | 97  | 40.4 |
|                                | <i>Very good</i>  | 974   | 45.3 | 439 | 44.8 | 202 | 43.2 | 218 | 47.2 | 115 | 47.9 |
| School performance             | <i>Very poor</i>  | 42    | 2.0  | 17  | 1.7  | 8   | 1.7  | 10  | 2.2  | 7   | 2.9  |
|                                | <i>Poor</i>       | 108   | 5.0  | 39  | 4.0  | 18  | 3.8  | 22  | 4.8  | 29  | 12.1 |
|                                | <i>Fair</i>       | 584   | 27.1 | 251 | 25.6 | 121 | 25.9 | 131 | 28.4 | 81  | 33.8 |
|                                | <i>Good</i>       | 1,167 | 54.2 | 553 | 56.3 | 258 | 55.1 | 248 | 53.7 | 108 | 45.0 |
|                                | <i>Very good</i>  | 251   | 11.7 | 122 | 12.4 | 63  | 13.5 | 51  | 11.0 | 15  | 6.3  |
| School year failure            | <i>No</i>         | 1,667 | 77.4 | 840 | 85.5 | 365 | 77.8 | 334 | 72.6 | 128 | 53.1 |
|                                | <i>Yes</i>        | 486   | 22.6 | 143 | 14.5 | 104 | 22.2 | 126 | 27.4 | 113 | 46.9 |
| Nervousness in the last month  | <i>Never</i>      | 98    | 4.5  | 56  | 5.7  | 18  | 3.8  | 11  | 2.4  | 13  | 5.4  |
|                                | <i>Rarely</i>     | 432   | 20.0 | 236 | 24.0 | 90  | 19.2 | 71  | 15.3 | 35  | 14.5 |
|                                | <i>Sometimes</i>  | 822   | 38.1 | 380 | 38.7 | 179 | 38.2 | 178 | 38.4 | 85  | 35.3 |
|                                | <i>Often</i>      | 673   | 31.2 | 267 | 27.2 | 156 | 33.3 | 168 | 36.3 | 82  | 34.0 |
|                                | <i>Very often</i> | 130   | 6.0  | 43  | 4.4  | 26  | 5.5  | 35  | 7.6  | 26  | 10.8 |
| Hopelessness in the last month | <i>Never</i>      | 1,048 | 48.8 | 510 | 52.1 | 232 | 49.5 | 204 | 44.3 | 102 | 42.3 |
|                                | <i>Rarely</i>     | 489   | 22.8 | 226 | 23.1 | 106 | 22.6 | 100 | 21.7 | 57  | 23.7 |
|                                | <i>Sometimes</i>  | 355   | 16.5 | 140 | 14.3 | 77  | 16.4 | 100 | 21.7 | 38  | 15.8 |
|                                | <i>Often</i>      | 187   | 8.7  | 69  | 7.0  | 41  | 8.7  | 45  | 9.8  | 32  | 13.3 |
|                                | <i>Very often</i> | 70    | 3.3  | 34  | 3.5  | 13  | 2.8  | 11  | 2.4  | 12  | 5.0  |
| Restlessness in the last month | <i>Never</i>      | 306   | 14.2 | 177 | 18.1 | 59  | 12.6 | 39  | 8.4  | 31  | 12.8 |
|                                | <i>Rarely</i>     | 601   | 28.0 | 291 | 29.7 | 119 | 25.5 | 130 | 28.1 | 61  | 25.2 |
|                                | <i>Sometimes</i>  | 712   | 33.1 | 313 | 32.0 | 169 | 36.2 | 149 | 32.3 | 81  | 33.5 |
|                                | <i>Often</i>      | 440   | 20.5 | 159 | 16.2 | 111 | 23.8 | 118 | 25.5 | 52  | 21.5 |
|                                | <i>Very often</i> | 91    | 4.2  | 39  | 4.0  | 9   | 1.9  | 26  | 5.6  | 17  | 7.0  |
| Sadness in the last month      | <i>Never</i>      | 1,417 | 65.9 | 674 | 68.7 | 310 | 66.2 | 292 | 63.5 | 141 | 58.5 |
|                                | <i>Rarely</i>     | 375   | 17.4 | 146 | 14.9 | 90  | 19.2 | 88  | 19.1 | 51  | 21.2 |
|                                | <i>Sometimes</i>  | 224   | 10.4 | 100 | 10.2 | 40  | 8.5  | 54  | 11.7 | 30  | 12.4 |
|                                | <i>Often</i>      | 105   | 4.9  | 48  | 4.9  | 24  | 5.1  | 22  | 4.8  | 11  | 4.6  |
|                                | <i>Very often</i> | 29    | 1.3  | 13  | 1.3  | 4   | 0.9  | 4   | 0.9  | 8   | 3.3  |
| Exhaustion in the last month   | <i>Never</i>      | 729   | 34.1 | 364 | 37.2 | 164 | 35.2 | 131 | 29.0 | 70  | 28.9 |
|                                | <i>Rarely</i>     | 648   | 30.3 | 302 | 30.8 | 135 | 29.0 | 142 | 31.4 | 69  | 28.5 |
|                                | <i>Sometimes</i>  | 440   | 20.6 | 178 | 18.2 | 110 | 23.6 | 102 | 22.6 | 50  | 20.7 |
|                                | <i>Often</i>      | 239   | 11.2 | 102 | 10.4 | 43  | 9.2  | 59  | 13.1 | 35  | 14.5 |
|                                | <i>Very often</i> | 83    | 3.9  | 33  | 3.4  | 14  | 3.0  | 18  | 4.0  | 18  | 7.4  |

|                                                           |                                 |       |      |     |      |     |      |     |      |     |      |
|-----------------------------------------------------------|---------------------------------|-------|------|-----|------|-----|------|-----|------|-----|------|
| Worthlessness in the last month                           | <i>Never</i>                    | 1,389 | 65.1 | 640 | 65.8 | 308 | 66.2 | 291 | 63.8 | 150 | 62.5 |
|                                                           | <i>Rarely</i>                   | 333   | 15.6 | 158 | 16.3 | 66  | 14.2 | 72  | 15.8 | 37  | 15.4 |
|                                                           | <i>Sometimes</i>                | 229   | 10.7 | 91  | 9.4  | 49  | 10.5 | 63  | 13.8 | 26  | 10.8 |
|                                                           | <i>Often</i>                    | 117   | 5.5  | 57  | 5.9  | 29  | 6.2  | 23  | 5.0  | 8   | 3.3  |
|                                                           | <i>Very often</i>               | 65    | 3.0  | 26  | 2.7  | 13  | 2.8  | 7   | 1.5  | 19  | 7.9  |
| Sleep quality                                             | <i>Deep/restful</i>             | 939   | 44.5 | 454 | 47.3 | 202 | 43.6 | 180 | 39.6 | 103 | 43.8 |
|                                                           | <i>Light</i>                    | 826   | 39.1 | 379 | 39.5 | 186 | 40.2 | 190 | 41.8 | 71  | 30.2 |
|                                                           | <i>Interrupted</i>              | 347   | 16.4 | 126 | 13.1 | 75  | 16.2 | 85  | 18.7 | 61  | 26.0 |
| Pathological gambling                                     | <i>No</i>                       | 1,903 | 89.3 | 892 | 92.0 | 429 | 92.3 | 402 | 87.8 | 180 | 75.6 |
|                                                           | <i>Yes</i>                      | 228   | 10.7 | 78  | 8.0  | 36  | 7.7  | 56  | 12.2 | 58  | 24.4 |
| Smoking habit                                             | <i>Regular smoker</i>           | 530   | 24.6 | 147 | 15.0 | 100 | 21.4 | 148 | 31.9 | 135 | 56.7 |
|                                                           | <i>Occasional/social smoker</i> | 315   | 14.6 | 122 | 12.4 | 72  | 15.4 | 84  | 18.1 | 37  | 15.5 |
|                                                           | <i>Non-smoker</i>               | 1,306 | 60.7 | 712 | 72.6 | 296 | 63.2 | 232 | 50.0 | 66  | 27.7 |
| Being drunk in the last year                              | <i>No</i>                       | 852   | 41.2 | 509 | 54.6 | 171 | 38.1 | 137 | 30.4 | 35  | 15.0 |
|                                                           | <i>Yes</i>                      | 1,214 | 58.8 | 423 | 45.4 | 278 | 61.9 | 314 | 69.6 | 199 | 85.0 |
| Binge drinking in the last month                          | <i>No</i>                       | 1,204 | 58.0 | 648 | 68.7 | 264 | 58.7 | 228 | 50.4 | 64  | 27.7 |
|                                                           | <i>Yes</i>                      | 872   | 42.0 | 295 | 31.3 | 186 | 41.3 | 224 | 49.6 | 167 | 72.3 |
| Drug use in the last month                                | <i>No</i>                       | 1,621 | 75.6 | 820 | 83.8 | 354 | 75.2 | 327 | 71.1 | 120 | 50.8 |
|                                                           | <i>Yes</i>                      | 524   | 24.4 | 158 | 16.2 | 117 | 24.8 | 133 | 28.9 | 116 | 49.2 |
| Bullying behavior in the last year                        | <i>No</i>                       | 1,869 | 87.5 | 866 | 89.4 | 425 | 90.6 | 396 | 86.3 | 182 | 76.2 |
|                                                           | <i>Yes</i>                      | 267   | 12.5 | 103 | 10.6 | 44  | 9.4  | 63  | 13.7 | 57  | 23.8 |
| Physical activity                                         | <i>Less than 1 time a week</i>  | 189   | 9.0  | 77  | 8.0  | 46  | 10.0 | 37  | 8.2  | 29  | 12.6 |
|                                                           | <i>1 or more times a week</i>   | 1,908 | 91.0 | 882 | 92.0 | 412 | 90.0 | 413 | 91.8 | 201 | 87.4 |
| Age of the first sexual intercourse                       | <i>No sexual initiation</i>     | 1,021 | 48.3 | 627 | 65.3 | 198 | 43.2 | 162 | 35.4 | 34  | 14.2 |
|                                                           | <i>After age 13</i>             | 827   | 39.1 | 246 | 25.6 | 212 | 46.3 | 236 | 51.6 | 133 | 55.6 |
|                                                           | <i>Before age 13</i>            | 266   | 12.6 | 87  | 9.1  | 48  | 10.5 | 59  | 12.9 | 72  | 30.1 |
| Use of alcohol or drug before the last sexual intercourse | <i>No</i>                       | 889   | 81.3 | 289 | 85.8 | 229 | 87.1 | 244 | 83.0 | 127 | 63.5 |
|                                                           | <i>Yes</i>                      | 205   | 18.7 | 48  | 14.2 | 34  | 12.9 | 50  | 17.0 | 73  | 36.5 |
| Use of condom during the last sexual intercourse          | <i>No</i>                       | 434   | 38.9 | 105 | 30.2 | 85  | 32.1 | 133 | 44.6 | 111 | 54.1 |
|                                                           | <i>Yes</i>                      | 682   | 61.1 | 243 | 69.8 | 180 | 67.9 | 165 | 55.4 | 94  | 45.9 |
| Average frequency of driving                              | <i>6 day a week/every day</i>   | 1,386 | 64.1 | 499 | 50.7 | 325 | 69.0 | 346 | 74.6 | 216 | 89.3 |
|                                                           | <i>2-5 days a week</i>          | 587   | 27.2 | 349 | 35.4 | 120 | 25.5 | 94  | 20.3 | 24  | 9.9  |
|                                                           | <i>1 day a week</i>             | 189   | 8.7  | 137 | 13.9 | 26  | 5.5  | 24  | 5.2  | 2   | 0.8  |
| Passenger of a                                            | <i>Never</i>                    | 1,680 | 79.4 | 840 | 86.8 | 366 | 79.9 | 340 | 74.9 | 134 | 57.0 |

|                                  |                             |       |      |     |      |     |      |     |      |     |      |
|----------------------------------|-----------------------------|-------|------|-----|------|-----|------|-----|------|-----|------|
| drunk driver                     | <i>Once a month</i>         | 373   | 17.6 | 120 | 12.4 | 80  | 17.5 | 101 | 22.2 | 72  | 30.6 |
|                                  | <i>A few times a month</i>  | 50    | 2.4  | 8   | 0.8  | 11  | 2.4  | 11  | 2.4  | 20  | 8.5  |
|                                  | <i>A few times a week</i>   | 4     | 0.2  | 0   | 0.0  | 1   | 0.2  | 1   | 0.2  | 2   | 0.9  |
|                                  | <i>Several times a week</i> | 8     | 0.4  | 0   | 0.0  | 0   | 0.0  | 1   | 0.2  | 7   | 3.0  |
| Passenger of a<br>drugged driver | <i>Never</i>                | 1,802 | 84.6 | 899 | 92.5 | 393 | 85.2 | 363 | 79.3 | 147 | 61.8 |
|                                  | <i>Once a month</i>         | 235   | 11.0 | 58  | 6.0  | 50  | 10.8 | 73  | 15.9 | 54  | 22.7 |
|                                  | <i>A few times a month</i>  | 57    | 2.7  | 9   | 0.9  | 17  | 3.7  | 12  | 2.6  | 19  | 8.0  |
|                                  | <i>A few times a week</i>   | 22    | 1.0  | 6   | 0.6  | 1   | 0.2  | 7   | 1.5  | 8   | 3.4  |
|                                  | <i>Several times a week</i> | 13    | 0.6  | 0   | 0.0  | 0   | 0.0  | 3   | 0.7  | 10  | 4.2  |

**Table S2.** Logistic regression models for the risk of road traffic accidents (RTA) and severe RTA

|                            | <b>Model 1</b><br><i>Outcome: <math>\geq 1</math> RTA(s)</i> | <b>Model 2</b><br><i>Outcome: <math>\geq 1</math> severe RTA(s)</i> |
|----------------------------|--------------------------------------------------------------|---------------------------------------------------------------------|
|                            | <i>Odds ratio (95%CI)</i>                                    | <i>Odds ratio (95%CI)</i>                                           |
| Clusters                   |                                                              |                                                                     |
| <i>Safe drivers (ref.)</i> | 1                                                            | 1                                                                   |
| Average drivers            | 1.22<br>(0.93-1.60)                                          | 0.94<br>(0.46-1.92)                                                 |
| Careless drivers           | 1.78**<br>(1.35-2.35)                                        | 1.26<br>(0.64-2.45)                                                 |
| Reckless drivers           | 3.24**<br>(2.29-4.58)                                        | 2.15**<br>(1.06-4.40)                                               |
| Sex                        |                                                              |                                                                     |
| <i>Male</i>                | 1                                                            | 1                                                                   |
| Female                     | 0.58**<br>(0.47- 0.73)                                       | 0.96<br>(0.54 – 1.69)                                               |
| Age                        |                                                              |                                                                     |
| $\leq 14$                  | 1                                                            | 1                                                                   |
| 15                         | 2.9 **<br>(1.69 – 4.98)                                      | 0.71<br>(0.13-3.9)                                                  |
| 16                         | 4.13 **                                                      | 1.39                                                                |

|                               |                          |                        |
|-------------------------------|--------------------------|------------------------|
|                               | ( 2.45 – 6.94)           | (0.29 -6.71)           |
| 17                            | 5.75**<br>(3.42 – 9.68)  | 1.18<br>(0.24 – 5.66)  |
| ≥ 18                          | 6.4 **<br>(3.73 – 10.98) | 1.01<br>(0.2 – 5.05)   |
| Average driving frequency     |                          |                        |
| <i>6 day a week/every day</i> | 1                        | 1                      |
| <i>Several times a week</i>   | 0.62 **<br>(0.49- 0.78)  | 0.80<br>(0.41-1.53)    |
| Once a week                   | 0.39 **<br>(0.25 – 0.60) | 1.27<br>(0.41 – 0.39)  |
| Type of motor vehicle driven  |                          |                        |
| <i>Passenger car</i>          | 1                        | 1                      |
| Moped ≤ 50 cc                 | 3.68 **<br>(2.65 – 5.12) | 0.74<br>(0.34-1.59)    |
| Motorbike 50 cc - 125 cc      | 3.63**<br>(2.45 – 5.36)  | 1.31<br>(0.55 – 3.10)  |
| Motorbike ≥ 125 cc            | 3.13 **<br>(2.02-4.86)   | 1.13<br>(0.43-3.00)    |
| Moped car ≤ 50 cc             | 2.09 *<br>(1.15- 3.81)   | 1.74<br>(0.5352 -5.67) |

\*  $p < 0,05$  \*\*  $p < 0,001$
